# Supplementary material for: Streptococcus pneumoniae outbreaks and implications for transmission and control: a systematic review
Source: Pneumonia (Nathan). 2018 Nov 5;10:11. doi: 10.1186/s41479-018-0055-4 (PMC6217781; doi:10.1186/s41479-018-0055-4)
Supplement: Supplementary file 2 — Table S1. Data extracted from reviewed articles. (XLSX 28 kb) [file 41479_2018_55_MOESM2_ESM.xlsx]

## Sheet: key
Streptococcus pneumoniae Outbreaks and Implications for Transmission and Control: A Systematic Review
Paul N Zivich MPH, John D Grabenstein PhD, Sylvia I Becker-Dreps MD, MPH, and David J Weber MD, MPH
SUPPLEMENT: extracted data from included and reviewed articles
Key	Definition
Author	First Author
UID	Unique identifier for unique outbreaks.
Publ_Year	Publication year of the article
Journal	Journal in which the outbreak report was published
Country	Country in which the outbreak occurred
Type	Disease etology of the outbreak (Conjunctivitis, Lower Respiratory tract, Otitis Media, Surgical site)
Year	Year in which the outbreak occurred, if indicated
Setting	Setting in which the outbreak occurred
Subpopulation	Further indication of setting, if applicable
Age_cat	Age category(s) for case-patients of the outbreak. (Toddler: 0-2 years old, Children: 2-17 years old, Young adult: 18-25 years old, Adult: 26-49 years old, Older adult: 50+ years old)
Serotype	Serotype of the pneumococcus strain related to the outbreak
Sequence_type	MLST sequence type number
Number_colonized	Number of individuals colonized with the outbreak strain
Percent_colonized	Percent of individual colonized with the outbreak strain, relative to the total amount tested
Number_infected	Number of individuals infected with the outbreak strain
AR	Attack rate of outbreak strain
MR	Mortality rate of outbreak strain
Linkage	Molecular technique used to link cases
Number_ever_vac	Number of individuals who were ever vaccinated within the setting
Number_vac_5	Number of individuals who were vaccinated in the prior five years of the outbreak
VE	Reported vaccine efficacy (unadjusted for all papers reviewed)
Resistance	Indicator of whether any antibiotic resistance was reported (1: yes, 0: no)
Penicillin	Indicator for penicillin resistance (1: yes, 0: no)
Cefotaxime	Indicator for cefotaxime resistance (1: yes, 0: no)
Erythromycin	Indicator for erythromycin resistance (1: yes, 0: no)
Tetracycline	Indicator for tetracycline resistance (1: yes, 0: no)
Levofloxacin	Indicator for levofloxacin resistance (1: yes, 0: no)
Vancomycin	Indicator for vancomycin resistance (1: yes, 0: no)
other_abx	Indicator of any other reported antibiotic resistance (1: yes, 0: no)
Isolation_InfectionControl	Indicator of whether any isolation precautions were used for infection prevention (1: yes, 0: no)
Antibiotics_InfectionControl	Indicator of whether any prophylactic antibiotics were used for infection prevention (1: yes, 0: no)
Vaccine_InfectionControl	Indicator of whether any prophylactic vaccination was used for infection prevention (1: yes, 0: no)

## Sheet: data
Author	UID	Publ_Year	Journal	Country	Type	Year	Setting	Subpopulation	Age_cat	Serotype	Sequence_type	Number_colonized	Percent_colonized	Number_infected	AR	MR	Linkage	Number_ever_vac	Number_vac_5	VE	Resistance	Penicillin	Cefotaxime	Erythromycin	Tetracycline	Levofloxacin	Vancomycin	other_abx	Isolation_InfectionControl	Antibiotics_InfectionControl	Vaccine
CDC	C01	2002	MMWR	ME, USA	Conjunctivis	2002	Community	School	Children/Young adult/Adult	Nontypeable				144			PFGE				1	0		1				0	1	0	0
Martin M	C02	2003	N Eng J Med	NH, USA	Conjunctivis	2002	Community	College	Young adult	Nontypeable	ST448	20	0.081	698	0.138		PFGE / MLST				1	0		1	0			0	1	0	0
Zegans ME	C02	2009	Clinical Science	NH, USA	Conjunctivis	2002	Community	College	Young adult	Nontypeable	ST448	20	0.081	698	0.138		PFGE / MLST				1	0		1	0			0	1	0	0
Crum NF	C03	2004	Clinical Infectious Diseases	CA, USA	Conjunctivis	2003	Military		Young adult/Adult	Nontypeable	ST1186	15	0.099	80	0.023	0	MLST	3500	3500		1	1		1	0	0	0	1	1	0	0
Buck JM	C04	2006	Pediatric Infectious Disease Journal	MN, USA	Conjunctivis	2003	Community		Toddler/Children/Young adult/Adult/Older adult	Nontypeable	ST448 / ST1186 / ST1270 / ST344			735		0	PFGE / MLST				1	1	0	1	1	0		1	1	0	0
Hennick M	C05	2006	CCDR	Canada	Conjunctivis	2005	Community	School	Toddler/Children/Young adult/Adult/Older adult	Nontypeable				47			AFLP				0	0		0		0		0	1	0	0
Shayegani M	C06	1982	J Clin Microbiology	NY, USA	Conjunctivis	1980	Community	College		Nontypeable				1567		0					1	0		0	0		0	1
Shayegani M	C07	1983	J Clin Microbiology	CA, USA	Conjunctivis	1981	Military			Nontypeable				80		0
Shayegani M	C08	1984	J Clin Microbiology	IL, USA	Conjunctivis	1981	Community	College		Nontypeable				1189		0
Ertugrul N	C09	1997	Journal of Infectious Diseases	IL, USA	Conjunctivis	1996	Military			Nontypeable				561		0	PFGE / PCR
Nakashima T	E01	2001	J Infect Chemother	Japan	Otitis Media	1997	Daycare	Children	Children	19 / 23 / 6				7			Antisera / RAPD				1	1		1		0		1
Marton A	E02	1997	International Journal of Antimicrobial Agents	Hungary	Otitis Media	1993-1994	Hospital	Infant	Toddler			0		6							1	1		1				1
Marton A	E03	1997	International Journal of Antimicrobial Agents	Hungary	Otitis Media	1996	Hospital	Infant	Toddler					3							1	1						1
Gilman BB	M01	1938	American Journal of Epidemiology	MA, USA	Multiple	1935	Community			1				35	0.07	0.114	Neufeld
McCrae T	R01	1916	Canadan Medical Association Journal	Canada	Respiratory		Community
Miller JL	R02	1918	JAMA	IO, USA	Respiratory	1918	Military							346		0.325													1
Schroder MC	R03	1930	Journal of Infectious Diseases	NY , USA	Respiratory	1926	School	Children	Children	5				150			Culture												1
Smillie WG	R04	1936	American Journal of Epidemiology	MA, USA	Respiratory	1935	Hospital	Psychiatric		2		21		17		0.471													1		1
Tilghman RC	R05	1936	Journal of Clinical Investigation	MA, USA	Respiratory		Community	Family	Toddler/Children/Young adult/Adult/Older adult	Variety
Smillie WG	R06	1938	American Journal of Public Health	MA, USA	Respiratory	1937	Hospital	Psychiatric		1			0.1	110															0		1
Hodges RG	R07	1946	Am J Hyg	USA	Respiratory	1942-1945	Military			Variety				1644		0	Neufeld												0	1	1
Hodges RG	R07	1946	Am J Hyg	USA	Respiratory	1942-1945	Military			Variety				1644		0	Neufeld												0	1	1
Hodges RG	R07	1946	Am J Hyg	USA	Respiratory	1942-1945	Military			Variety				1644		0	Neufeld												0	1	1
Hodges RG	R07	1946	Am J Hyg	USA	Respiratory	1942-1946	Military			Variety				1644		0	Neufeld												0	1	1
Hodges RG	R07	1946	Am J Hyg	USA	Respiratory	1942-1945	Military			Variety				1644		0	Neufeld												0	1	1
DeMaria A	R08	1980	JAMA	MA, USA	Respiratory	1978	Community	Homeless Shelter	Older adult	1		10	0.1	39			Quelleng												0	0	1
Fenton PA	R09	1983	BMJ	UK	Respiratory		Community		Adult/Older adult	1
Davies AJ	R10	1984	British Medical Journal	UK	Respiratory		Hospital	Postnatal		9				4			Immunoelectrophoresis
Berk SL	R11	1985	Southern Medical Journal	TN, USA	Respiratory	1983	Hospital	Oncology	Older adult	8		0	0	4	0.18	0.5	Quelleng												0	0	1
Collingham KE	R12	1985	Journal of Infection	AL, USA	Respiratory		Community	Family	Older adult	12				2		0.5
Mehtar S	R13	1986	BMJ	UK	Respiratory		Hospital	Maternity	Toddler	6				3		0.333
Davies AJ	R14	1987	Journal of Hospital Infection	UK	Respiratory	1984-1985	Hospital	Geriatric	Older adult	3			0.25	8		0.25	Quelleng
Gould FK	R15	1987	Journal of Infection	UK	Respiratory		Hospital	Geriatric	Older adult	23				6							1	1		0	1		0	1
Moore EP	R16	1988	Journal of Infection	UK	Respiratory	1987	Hospital	Pulmonary	Older adult	23				4		0.25					1	1		0	1			1	1	0	0
Hoge CW	R17	1994	N Eng J Med	TX, USA	Respiratory	1989	Jail		Young adult/Adult	12F		11	0.07	46	0.005	0.043		2			0	0							1	1	1
CDC	R17	1989	MMWR	TX, USA	Respiratory	1989	Jail		Young adult/Adult	12F		11	0.07	17	0.005	0.043		2			0	0							1	1	1
Rauch AM	R18	1990	American Journal of Diseases of Children	TX, USA	Respiratory	1988	Daycare	Children	Toddler	14		10	0.093	2	0.024	0					1	1		0	1		0	1	0	1	0
Bain M	R19	1990	British Journal of Hospital Medicine	UK	Respiratory		Hospital	Geriatric	Older adult	4				4			Quelleng				0	0							1	1	0
Mercat A	R20	1991	Chest	France	Respiratory	1988-1989	Community	Homeless Shelter	Young adult/Adult/Older adult	1		1	0.02	39		0.04	Quelleng	4	4		1							1
Cartmill TDI	R21	1992	Journal of Hospital Infection	UK	Respiratory	1991	Hospital	Geriatric	Older adult	6		1		4		0.25		0			1	1		1	1		0	1	1	0	0
Dawson S	R22	1992	Journal of Hospital Infection	UK	Respiratory	1991	Hospital	Geriatric	Older adult	6		1		5							1	1	1	1	1		0	1
PHLS	R23	1992	CDR Weekly	UK	Respiratory	1991-1992	Hospital			9				7		0.143					1	1							1	0	1
Quick RE	R24	1993	American Journal of Medicin	WA, USA	Respiratory	1990	LTCF	Geriatric	Older adult	9V		2	0.03	7	0.074	0.71	Quelleng	1	0
Gratten M	R25	1993	Medical Journal of Australia	Australia	Respiratory	1991	Community	Minority	Young adult/Adult/Older adult	1		13	0.173	18			Antisera
Denton M	R26	1993	Journal of Hospital Infection	UK	Respiratory	1991	Hospital	Oncology	Older adult	14				8		0.125					0	0		0			0		1	0	0
Cherian T	R27	1994	JAMA	MD, USA	Respiratory	1992	Daycare	Children	Toddler	12F		6	1	4	0.667	0	Ribotyping	1	1		0	0		0				0	0	1	0
Millar MR	R28	1994	Journal of Hospital Infection	UK	Respiratory	1993	Hospital	Geriatric	Older adult	9		0	0	10	0.057			0			1	1	0	0	1		0	1	1	0	0
Mandigers CMPW	R29	1994	Eur Respir J	Netherlands	Respiratory	1990-1991	Hospital	Pulmonary	Older adult	9				18		0.556	Quelleng				1	1		1	0			1
Nims L	R30	1994	MMWR	NM, USA	Respiratory	1993-1994	Daycare	Children	Toddler	19		3		14		0.5	PCR												0	1	1
Raymond J	R31	1995	Clinical Infectious Diseases	France	Respiratory		Hospital		Toddler	23F				2			RAPD				1	1	1	1			0	1
Gillespie SH	R32	1997	J Clin Pathol	UK	Respiratory	1992	Hospital	Geriatric	Older adult	9		3		9		0.444	RFLP				1	1	0		1				1	0	1
Fiore AE	R33	1998	Journal of the American Geriatric Society	MA, USA	Respiratory	1995	LTCF	Geriatric	Older adult	14				10	0.149	0.2	PCR												1	0	1
CDC	R33	1997	MMWR	MA, USA	Respiratory	1995	LTCF	Geriatric	Older adult	14				10	0.149	0.2	PCR												1	0	1
CDC	R34	1997	MMWR	OK, USA	Respiratory	1996	LTCF	Geriatric	Older adult	23F		17	0.23	11	0.13	0.27	PFGE	3			1	1	1	1			0	1	0	1	1
Nuorti JP	R34	1998	N Eng J Med	OK, USA	Respiratory	1996	LTCF	Geriatric	Older adult	23F		17	0.23	11	0.13	0.27	PFGE	3			1	1	1	1			0		0	1	1
CDC	R35	1997	MMWR	MY, USA	Respiratory	1996	LTCF	Geriatric	Older adult	4				14	0.117	0.29	PCR				0	0	0	0	0		0	0
Musher DM	R36	1997	Clinical Infectious Diseases	TX, USA	Respiratory		Military		Young Adult	1				128	0.032
Musher DM	R37	1997	Clinical Infectious Diseases	TX, USA	Respiratory		Military		Young Adult	7F / 8		44	0.284	14	0.064
Sheppard DC	R38	1998	Infection Control and Hospital Epidemiology	CA, USA	Respiratory	1997	LTCF	Geriatric	Older adult	14		0	0	15	0.125														1	0	1
Razzaq N	R39	1998	J Infect	UK	Respiratory		Community		Toddler/Older adult	12F				2							0	0	0
Craig AS	R40	1999	Clinical Infectious Diseases	TN, USA	Respiratory	1996	Daycare	Children	Toddler	14		15	0.19	3	0.034	0	PFGE				1	1	1	1			0	1	0	1	0
de Galan BE	R41	1999	Journal of Hospital Infection	Netherlands	Respiratory	1995-1997	Hospital	Pulmonary	Older adult	15				36		0.297	Quelleng / RFEL				1	1		1			0	1	1	0	0
Kellner JD	R42	1999	Emergining Infectious Diseases	Canada	Respiratory	1996-1997	Community	Family	Adult/Older adult					6		0.167	PFGE	0			1	1		1
Leggiadro RJ	R43	1999	Hospital Practice	USA	Respiratory		LTCF	Geriatric	Older adult			4		3							1	1	1						1	1	1
Gleich S	R44	2000	Infection Control and Hospital Epidemiology	NY , USA	Respiratory	1997	LTCF	Geriatric	Older adult	4				11	0.055		PFGE	0			0	0		0	0		0	0	0	1	1
Dagan R	R45	2000	Clinical Infectious Diseases	Israel	Respiratory	1996-1997	Community	Minority		1		31	0.048	5			Ribotyping												0	0	1
CDC	R46	2001	MMWR	NJ, USA	Respiratory	2001	LTCF	Geriatric	Older adult	14				9		0.444	PFGE	0		1.00 (0.30, 1.00)	1	0		1					1	0	1
Tan CG	R46	2003	Infection Control and Hospital Epidemiology	NJ, USA	Respiratory	2001	LTCF	Geriatric	Older adult	14				9		0.444	PFGE	0		1.00 (0.30, 1.00)	1	0		1					1	0	1
Weiss K	R47	2001	Clinical Infectious Diseases	Canada	Respiratory	1995-1996	Hospital	Pulmonary	Older adult	23F				23		0.087	PFGE				1	1		0		1		1	1	0	0
Melamed R	R48	2002	Scand J Infect D	Israel	Respiratory		Hospital	Infant	Toddler	5		0		3			RAPD				0	0	0	0			0	0
Crum NF	R49	2003	Am J Prev Med	CA, USA	Respiratory	2000	Military		Young Adult	9V / 4		13	0.11	52	0.015	0	Quelleng	0			1	1		0		0		0	0	1	1
Subramanian D	R50	2003	Journal of Hospital Infection	UK	Respiratory	2001	Hospital	Ear/Nose/Throat		9V		3	0.055	9			PFGE	0			1	1							1	1	0
Sanchez JL	R51	2003	Military Medicine	USA	Respiratory	1998-1999	Military		Young adult/Adult	3 / 6 / 9 / 14 / 20 / 22 / 23		30	0.136	30	0.121		PCR				1	1		0		0	0	0	0	1	1
Banerjee A	R52	2005	Medical Journal Armed Forces India	India	Respiratory	2002	Military									0	RAPD												1	1	0
CDC	R53	2005	Infection Control and Hospital Epidemiology	NY , USA	Respiratory	1995-1996	Hospital	AIDS patients	Adult	23F / 3		6	0.09	7		0.29	PFGE	1		0.87 (-0.03, 0.98)	1	1		1	1	1			1	1	1
CDC	R54	2005	MMWR	AK, USA	Respiratory	2003-2004	Community		Toddler/Children/Young adult/Adult/Older adult	12F	ST1527 / ST217	46	0.024	14	0.001		PFGE / MLST	9	1		1							1	0	0	1
Zulz T	R54	2013	Journal of Clinical Microbiology	AK, USA	Respiratory	1986-2009	Community	Rural	Toddler/Children/Young adult/Adult/Older adult	12F	ST1527 / ST218	46	0.024	14	0.001		PFGE / MLST	9	1		1							1	0	0	1
Birtles A	R55	2005	Journal of Clinical Microbiology	UK	Respiratory		Community	Homeless Shelter	Adult	8	ST53			2		1	MLST	0											0	0	1
Hansmann Y	R56	2006	Infection Control and Hospital Epidemiology	France	Respiratory	2003	LTCF	Geriatric	Older adult	4		1	0.012	11	0.117	0.273	Antisera / Urine	1	1										1	0	1
Singh PMP	R57	2006	Indian Journal of Community Medicine	India	Respiratory	2004	Military		Young adult					316		0													1	0	0
Cashman P	R58	2007	Commun Dis Intell	Australia	Respiratory	2006	School	Children	Children	1				25															1	0	0
Sheppard CL	R59	2008	Epidemiology and Infection	UK	Respiratory	2003	Community		Children/Young adult/ Adult	1	ST227			11		0.182	PCR / MLST
Romney MG	R60	2008	Clinical Infectious Diseases	Canada	Respiratory	2006-2007	Community		Toddler/Children/Young adult/Adult/Older adult	5				137		0.08	Pneumotest-Latex				0	0	0					0	0	0	1
Vainio A	R61	2009	APMIS	Finland	Respiratory	2006	Military			7F	ST2331	9	0.209	5	0.12	0	MLST				0	0
Gupta A	R62	2009	BMJ	UK	Respiratory	2006	School	Children	Children	1		1	0.012	5			ELISA / Urine												0	1	1
Mehiri-Zghal E	R63	2010	Diagnostic Microbiology and Infectious Disease	Tunisia	Respiratory	2001-2002	Jail			1		9	0.45	150	0.0375		PFGE				0	0	0	0	0	0		0
Balicer RD	R64	2010	Vaccine	Israel	Respiratory	2005-2006	Military		Young adult	5	ST289	35	0.241	34		0	PFGE / MLST	0			1	0		0	0			1	0	1	1
Pichon B	R65	2010	Journal of Clinical Microbiology	UK	Respiratory	2007-2008	Community	Children		5	ST289			8			MLST
Dawood FS	R66	2011	BMC Infectious Diseases	MO, USA	Respiratory	2009	Military		Young adult	7F		16	0.043	74	0.003	0.027	Quelleng				0	0							1	1	1
Vanderkooi OG	R67	2011	PLoS ONE	Canada	Respiratory	2005-2007	Community		Children/Young adult/Adult/Older adult	5 / 8	ST289 / ST1268			207			Quelleng / MLST				1	0		0				1	0	0	1
Skoczynska A	R68	2012	Pol Arch Med Wewn	Poland	Respiratory	2009	Hospital	Pulmonary	Older adult	14	ST156			6			PFGE / MLST				1	1							1	0	0
Fleming-Dutra K	R69	2012	Emergining Infectious Diseases	RI, USA	Respiratory	2011	Hospital	Children Psychiatric	Children/Young adult	15A		6		11			PCR / MLST												1	1	0
CDC	R70	2013	MMWR	CO, USA	Respiratory	2012	LTCF	Geriatric	Adult/Older adult	3				7	0.5	0.43		7											0	1	1
Kuroki T	R71	2014	J Am Geriatr Soc	Japan	Respiratory	2013	Hospital	Geriatric	Older adult	3	ST180			16	0.839	0.063	PFGE / MLST	0			1	0		1			0	1
Ben-David D	R72	2014	Emergining Infectious Diseases	Israel	Respiratory	2006-2011	Hospital	Sub-acute	Young adult/Adult/Older adult	19F / 23F	ST156	21	0.202	66			PFGE / MLST				1	1		1	1	1		1	0	0	1
Schillberg E	R73	2014	Clinical Infectious Diseases	Canada	Respiratory	2009-2011	Community		Children/Young adult/Adult/Older adult	12F	ST218			32			Quelleng / PFGE / MLST / MLVA	9			1	0		1		0			0	0	1
Suryam V	R74	2015	Medical Journal of Armed Forces of India	India	Respiratory	2011	Military							52		0													1	1	0
Thomas HL	R75	2015	Epidemiology and Infection	UK	Respiratory	2012	LTCF	Geriatric	Older adult	8	ST53			15	0.65	0.133	BinaxNOW / MLST	8	0	-0.4 (-2.3, 0.4)	0	0		0	0				1	1	1
Kunwar R	R76	2015	Indian Journal of Public Health	India	Respiratory	2011-2012	Military		Young adult					58	0.011	0													1	1	0
Sheppard CL	R77	2016	JMM Case Reports	UK	Respiratory		Hospital	Geriatric	Older adult	6C				13		0.231	BinaxNOW												1	1	0
Ewing J	R78	2017	Vaccine	UK	Respiratory	2015	Workplace	Oil rig	Young adult/Adult/Older adult	4	ST801			25		0	WGS / MLST												0	1	1
Jauneikaite E	R79	2017	Journal of Clinical Microbiology	UK	Respiratory		Hospital	Pulmonary	Older adult	9V	ST156			4			WGS / MLST	3	0		1	1		1	1				0	1	1
Mackenzie GM	R80	1940	Trans Assoc Am Physicians	NY, USA	Respiratory	1938-1939	Community			1		43	0.18	4	0.016		Neufeld
Guillet M	S01	2012	American Journal of Infection Control	France	Surgical Site		Hospital			3		1		4
